# Supplementary material for: Downregulation of P300/CBP-Associated Factor Protects from Vascular Aging via Nrf2 Signal Pathway Activation
Source: MDPI journal article supplement (doi:10.3390/ijms232012574), 2022-10-20
Supplement: s1 [file s1]

**Table S1. The clinical information of the patients enrolled in this study**

|   | <b>Name</b> | <b>Gender</b> | <b>Age (years)</b> | <b>Main Clinical Diagnosis</b>            | <b>Operative Methods</b> | <b>PCAF Expression<br/>(optical density)</b> |
|---|-------------|---------------|--------------------|-------------------------------------------|--------------------------|----------------------------------------------|
| 1 | <i>LM</i>   | female        | 15                 | Complex cyanotic congenital heart disease | heart transplantation    | 0.264                                        |
| 2 | <i>FJQ</i>  | male          | 18                 | dilated cardiomyopathy                    | heart transplantation    | 0.268                                        |
| 3 | <i>ZX</i>   | male          | 30                 | dilated cardiomyopathy                    | heart transplantation    | 0.468                                        |
| 4 | <i>ZYQ</i>  | male          | 33                 | dilated cardiomyopathy                    | heart transplantation    | 0.273                                        |
| 5 | <i>ZCQ</i>  | male          | 34                 | dilated cardiomyopathy                    | heart transplantation    | 0.38                                         |
| 6 | <i>ZJ</i>   | male          | 35                 | dilated cardiomyopathy                    | heart transplantation    | 0.191                                        |
| 7 | <i>CZH</i>  | male          | 37                 | dilated cardiomyopathy                    | heart transplantation    | 0.231                                        |
| 8 | <i>LYS</i>  | male          | 38                 | dilated cardiomyopathy                    | heart transplantation    | 0.21                                         |
| 9 | <i>ZWL</i>  | male          | 40                 | dilated cardiomyopathy                    | heart transplantation    | 0.529                                        |

|    |            |        |    |                         |                               |       |
|----|------------|--------|----|-------------------------|-------------------------------|-------|
| 10 | <i>ZC</i>  | male   | 42 | heart failure           | heart-lung<br>transplantation | 0.426 |
| 11 | <i>LSB</i> | male   | 42 | dilated cardiomyopathy  | heart transplantation         | 0.429 |
| 12 | <i>WBJ</i> | male   | 42 | ischemic cardiomyopathy | heart transplantation         | 0.354 |
| 13 | <i>GMZ</i> | male   | 43 | dilated cardiomyopathy  | heart transplantation         | 0.506 |
| 14 | <i>HXR</i> | female | 43 | ischemic cardiomyopathy | heart transplantation         | 0.561 |
| 15 | <i>HFX</i> | male   | 44 | ischemic cardiomyopathy | heart transplantation         | 0.736 |
| 16 | <i>CJY</i> | male   | 45 | ischemic cardiomyopathy | heart transplantation         | 0.587 |
| 17 | <i>ZCH</i> | male   | 45 | dilated cardiomyopathy  | heart transplantation         | 0.697 |
| 18 | <i>WLQ</i> | male   | 48 | ischemic cardiomyopathy | heart transplantation         | 0.763 |
| 19 | <i>HW</i>  | male   | 48 | ischemic cardiomyopathy | heart transplantation         | 0.769 |
| 20 | <i>CHR</i> | male   | 49 | Eisenmenger syndrome    | heart transplantation         | 0.728 |
| 21 | <i>LSX</i> | male   | 49 | dilated cardiomyopathy  | heart transplantation         | 0.703 |
| 22 | <i>GXF</i> | male   | 49 | dilated cardiomyopathy  | heart transplantation         | 0.934 |

|    |            |        |    |                         |                       |       |
|----|------------|--------|----|-------------------------|-----------------------|-------|
| 23 | <i>WWY</i> | female | 50 | ischemic cardiomyopathy | heart transplantation | 0.801 |
| 24 | <i>RAM</i> | female | 50 | dilated cardiomyopathy  | heart transplantation | 0.794 |
| 25 | <i>JWD</i> | male   | 51 | ischemic cardiomyopathy | heart transplantation | 0.905 |
| 26 | <i>FDL</i> | male   | 52 | dilated cardiomyopathy  | heart transplantation | 0.869 |
| 27 | <i>CJY</i> | female | 52 | valvular heart disease  | heart transplantation | 0.825 |
| 28 | <i>SSL</i> | female | 52 | dilated cardiomyopathy  | heart transplantation | 0.874 |
| 29 | <i>LJX</i> | female | 53 | heart failure           | heart transplantation | 0.786 |
| 30 | <i>ZDZ</i> | female | 53 | ischemic cardiomyopathy | heart transplantation | 0.791 |
| 31 | <i>XHK</i> | male   | 54 | ischemic cardiomyopathy | heart transplantation | 0.859 |
| 32 | <i>MCX</i> | male   | 55 | dilated cardiomyopathy  | heart transplantation | 0.874 |
| 33 | <i>LGY</i> | male   | 56 | dilated cardiomyopathy  | heart transplantation | 0.783 |
| 34 | <i>WZY</i> | male   | 56 | dilated cardiomyopathy  | heart transplantation | 0.907 |
| 35 | <i>ZLF</i> | male   | 57 | dilated cardiomyopathy  | heart transplantation | 0.74  |

|    |            |        |    |                         |                       |       |
|----|------------|--------|----|-------------------------|-----------------------|-------|
| 36 | <i>YWZ</i> | male   | 58 | dilated cardiomyopathy  | heart transplantation | 0.869 |
| 37 | <i>LJS</i> | male   | 59 | dilated cardiomyopathy  | heart transplantation | 0.937 |
| 38 | <i>CE</i>  | male   | 59 | dilated cardiomyopathy  | heart transplantation | 0.823 |
| 39 | <i>YAP</i> | female | 59 | ischemic cardiomyopathy | heart transplantation | 0.841 |
| 40 | <i>ZYM</i> | male   | 59 | ischemic cardiomyopathy | heart transplantation | 0.874 |
| 41 | <i>GSQ</i> | male   | 60 | heart failure           | heart transplantation | 0.976 |
| 42 | <i>SCR</i> | female | 60 | dilated cardiomyopathy  | heart transplantation | 0.713 |
| 43 | <i>WKF</i> | female | 60 | dilated cardiomyopathy  | heart transplantation | 0.883 |
| 44 | <i>ZQG</i> | male   | 61 | dilated cardiomyopathy  | heart transplantation | 0.893 |

**Supplementary Figure S1**

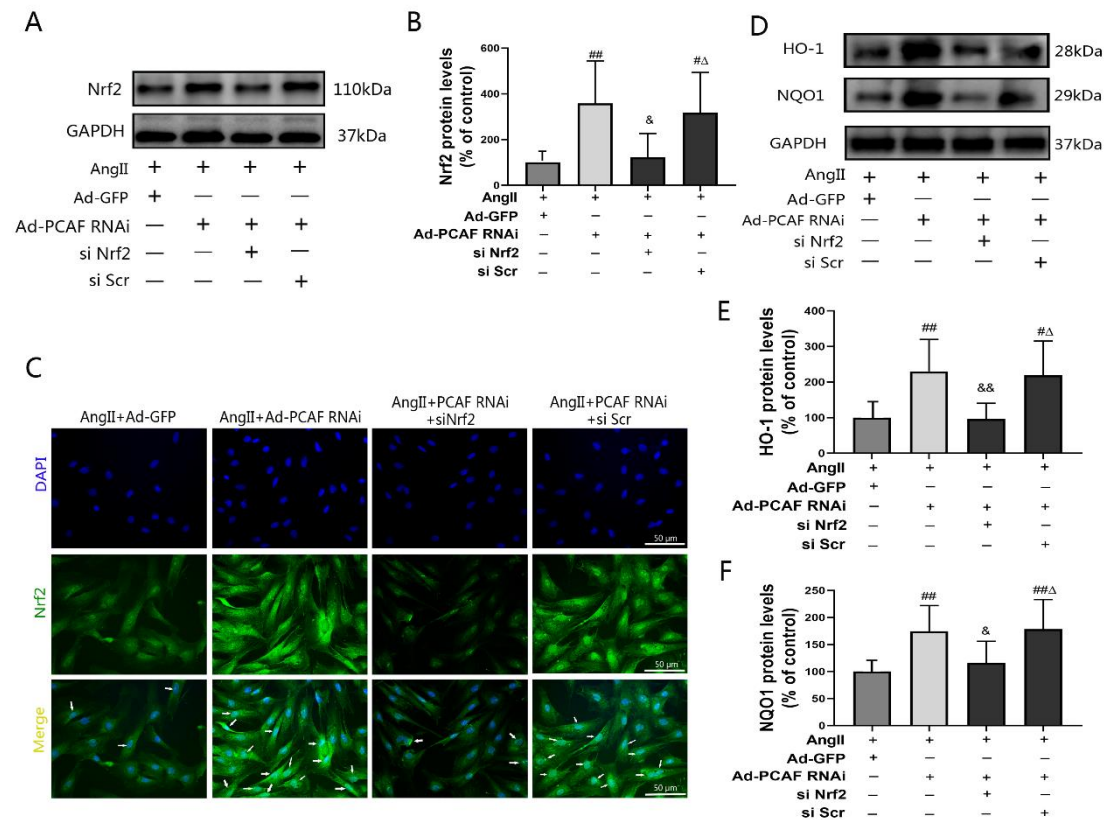

**Supplementary Figure S1** The expression of Nrf2 and its downstream HO-1 and NQO1 in ECs decreased significantly after Nrf2 silencing. (A-B) Nrf2 small interfering RNA (siRNA) inhibits the expression of Nrf2 in ECs, detected by western blot (n=6). (C) Immunofluorescence detection of Nrf2 distribution in each group. The scale bar is 50 μm, 400× (n=3). (D-F) Western blot to determine the expression of HO-1 and

NQO1 in each group (n=6). <sup>#</sup> $p < 0.05$ , <sup>##</sup> $p < 0.01$  vs. AngII+Ad-GFP group; <sup>&</sup> $p < 0.05$ , <sup>&&</sup> $p < 0.01$  vs. the AngII induction with Ad-PCAF RNAi group (AngII+Ad-PCAF RNAi group); <sup>△</sup> $p < 0.05$  vs. the AngII induction with Ad-PCAF RNAi group and Nrf2 small interfering RNA (AngII+Ad-PCAF RNAi+si Nrf2 group).
